# Supplementary material
Source: HighWire-hosted journal article supplement (https://ijgc.bmj.com/highwire/filestream/27961/field_highwire_adjunct_files/0/ijgc-2022-004034supp001_data_supplement.pdf)
Supplement: ijgc-2022-004034supp001_data_supplement.pdf [file ijgc-2022-004034supp001_data_supplement.pdf]

| <b>Variables</b>                      | <b>Risk factors</b> | <b>HR (95% CI)</b> | <b><i>p</i></b> |
|---------------------------------------|---------------------|--------------------|-----------------|
| <b><i>Locoregional recurrence</i></b> |                     |                    |                 |
| <b>Age</b>                            |                     | 1.00 (0.94–1.06)   | 0.94            |
| <b>Tumour size</b>                    | >4 cm vs. ≤4 cm     | 2.83 (1.45–5.50)   | 0.002           |
| <b>Histology</b>                      | Non-end vs. end.    | 1.76 (0.85–3.62)   | 0.13            |
| <b>Grade</b>                          | III vs. I-II        | 1.67 (0.80–3.51)   | 0.17            |
| <b>LVSI</b>                           | Absent vs. present  | 0.73 (0.37–1.45)   | 0.37            |
| <b>Cervical glandular inv</b>         | Absent vs. present  | 0.78 (0.36–1.67)   | 0.52            |
| <b>Cervical stromal inv</b>           | Absent vs. present  | 1.69 (0.75–3.81)   | 0.21            |
| <b>Ln metastasis</b>                  | Present vs. absent  | 1.21 (0.44–3.32)   | 0.72            |
| <b>Stage</b>                          | III vs. I-II        | 3.34 (1.08–10.30)  | 0.04            |
| <b><i>Distant metastasis</i></b>      |                     |                    |                 |
| <b>Age</b>                            |                     | 1.02 (0.99–1.06)   | 0.2             |
| <b>Tumour size</b>                    | >4 cm vs. ≤4 cm     | 1.42 (0.97–2.08)   | 0.08            |
| <b>Histology</b>                      | Non-end vs. end.    | 1.47 (0.95–2.26)   | 0.08            |
| <b>Grade</b>                          | III vs. I-II        | 1.66 (1.07–2.57)   | 0.02            |
| <b>LVSI</b>                           | Absent vs. present  | 0.88 (0.58–1.33)   | 0.53            |
| <b>MI</b>                             | ≥1/2 vs. <1/2       | 1.44 (0.67–3.11)   | 0.35            |
| <b>Cervical glandular inv</b>         | Absent vs. present  | 0.60 (0.37–0.98)   | 0.04            |
| <b>Cervical stromal inv</b>           | Absent vs. present  | 0.44 (0.27–0.72)   | 0.001           |

|                      |                    |                  |       |
|----------------------|--------------------|------------------|-------|
| <b>Ln metastasis</b> | Present vs. absent | 2.85 (1.35–6.00) | 0.006 |
| <b>Stage</b>         | III vs. I-II       | 2.17 (0.94–5.02) | 0.07  |
